# Supplementary material
Source: PubMed Central journal article supplement (PMC2610267)
Supplement: NIHMS81658-supplement-suppl.pdf [file NIHMS81658-supplement-suppl.pdf]

**Fig. S1**

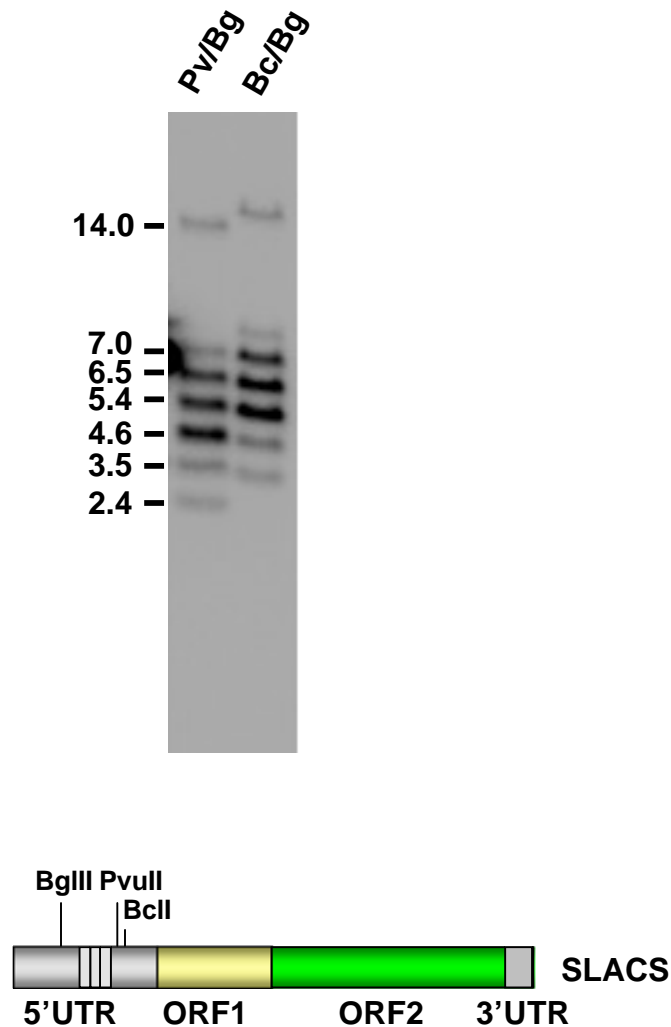

Supplementary Figure 1. Southern blot analysis of SLACS repeat regions. Y Tat 1.1 genomic DNA was digested with either PvuII and BglII (Pv/Bg) or BclI and BglII (Bc/Bg), separated on a .7% agarose gel, and hybridized to a probe complementary to the 185 bp SLACS repeat sequence. The size of each band indicates the number of SLACS repeats in various elements found in the *T. brucei rhodesiense* genome. The numbers alongside the blot estimate the number of 185-bp repeats contained in each band of the PvuII/BglII digest (the SLACS reference sequence (accession #X17078) contains 3.5 185-bp repeats).

# Fig. S2

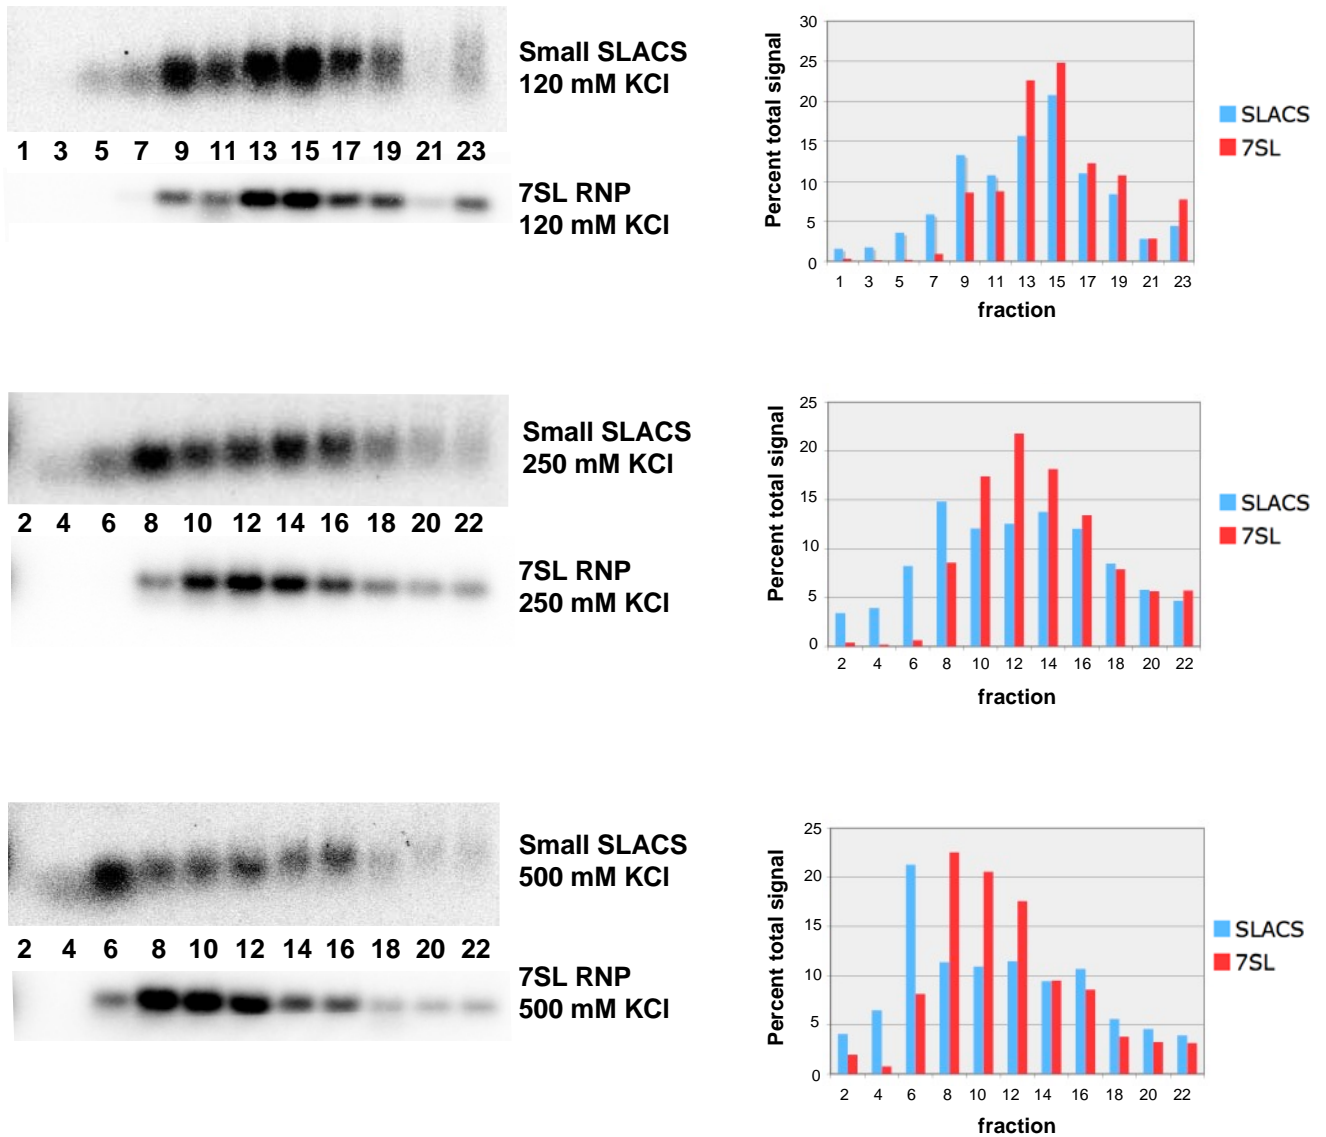

Supplementary Figure 2. sSLACS RNP stability in different salt concentrations. A post-nuclear supernatant from *ago1*<sup>-/-</sup> cells (S14) was separated by high speed centrifugation in a soluble (S100) and pellet fraction (P100) and the S100 was applied to a 10-30% glycerol density gradient containing 120 mM KCl, 250 mM KCl, or 500 mM KCl. Selected fractions were Northern blotted with a probe complementary to SLACS ORF1 and subsequently hybridized with a probe complementary to the 7SL RNA. The intensity of signal in each fraction was quantitated using OptiQuant software (Perkin Elmer) and expressed as a percent of the total hybridization signal in the graphs on the right.

# Fig. S3

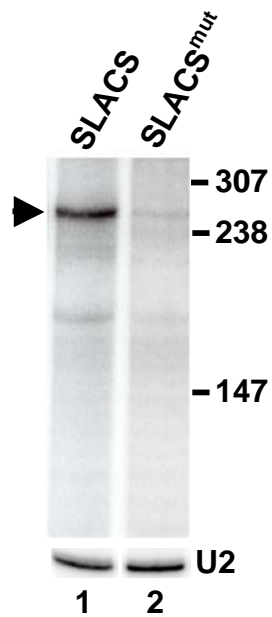

Supplementary Figure 3. *In vitro* transcription of pSLACS and pSLACS<sup>mut</sup> vectors. Both pSLACS and pSLACS<sup>mut</sup> were digested with BglII and added to transcription reactions containing [ $\alpha$ -<sup>32</sup>P]GTP. Transcription of pSLACS produced an ~250 nt radiolabeled RNA.

**Fig. S4**

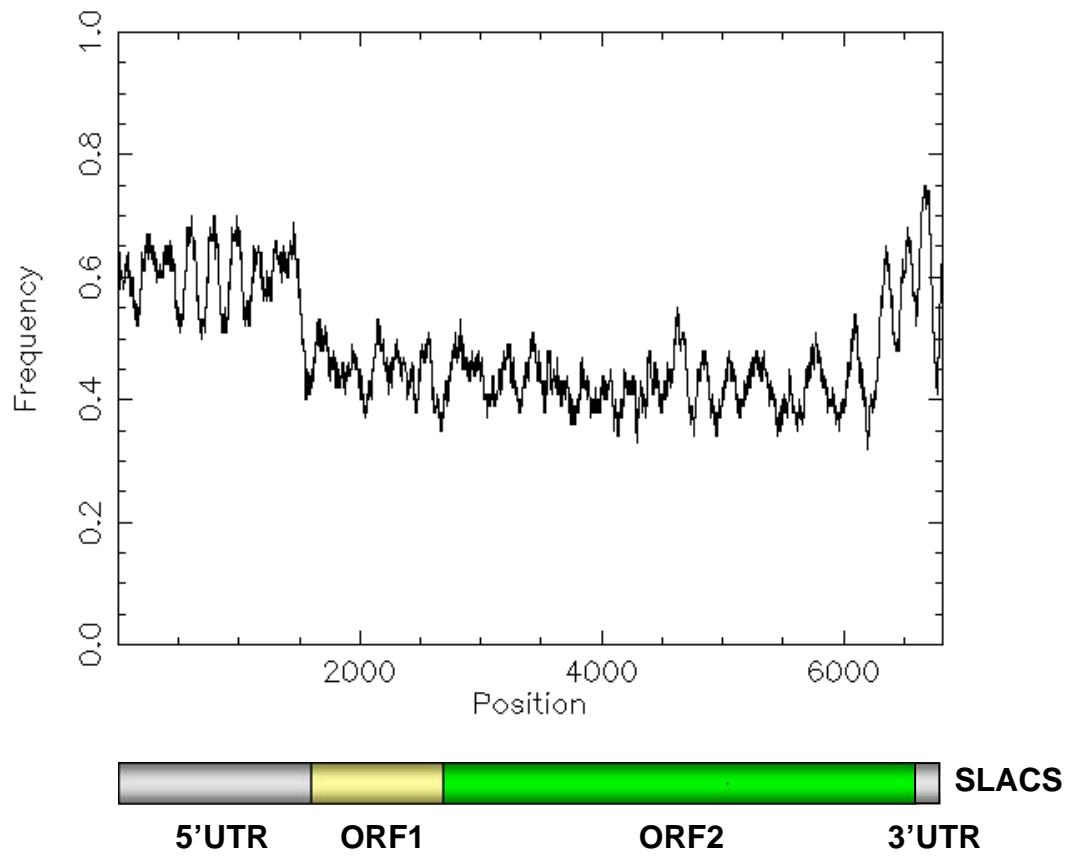

Supplementary Figure 4. FREAK program analysis of SLACS A+T content.
